# Supplementary material for: First Y-type actinomycins from Streptomyces with divergent structure-activity relationships for antibacterial and cytotoxic properties
Source: Royal Society of Chemistry journal article supplement (doi:10.1039/b815689a), 2008-12-11
Supplement: b815689a.pdf [file b815689a.pdf]

## Electronic Supplementary Information

# First Y-Type Actinomycins from *Streptomyces* with Divergent Structure-Activity Relationships for Antibacterial and Cytotoxic Properties

Jens Bitzer, Martin Streibel, Hans-Jörg Langer, Stephanie Grond\*

Institute of Organic and Biomolecular Chemistry, University of Göttingen, Tammannstr.2,  
D-37077 Göttingen, Germany

\* To whom correspondence should be addressed. Tel. +49 (0)551 – 393095. Fax: +49 (0)551  
– 393228. E-mail: sgrond@gwdg.de

### Table of Contents

|                                                                                                          |       |
|----------------------------------------------------------------------------------------------------------|-------|
| General Experimental Procedures                                                                          | p. 2  |
| Chiral amino acid analysis                                                                               | p. 2  |
| Figure S1. Isolation scheme for actinomycins Y <sub>1</sub> – Y <sub>5</sub> ( <b>1</b> – <b>5</b> )     | p. 3  |
| Figure S2. Selected details of important spectroscopic data                                              | p. 4  |
| Figure S3. Structural formulae of actinomycins D, G <sub>2</sub> , G <sub>3</sub> , and G <sub>5</sub>   | p. 4  |
| Table S1: HM02 cell cycle investigation with actinomycin Y <sub>1</sub> ( <b>1</b> )                     | p. 5  |
| Table S2: Antiparasitic bioactivity of Y-type actinomycins <b>1</b> and <b>3</b>                         | p. 5  |
| Table S3: Overview on naturally occurring actinomycins                                                   | p. 6  |
| Table S4: Overview on actinomycins derived by precursor-directed biosynthesis                            | p. 7  |
| Table S5. NMR data of actinomycin Y <sub>2</sub> ( <b>2</b> ) (CD <sub>3</sub> OD)                       | p. 9  |
| Table S6. NMR data of actinomycin Y <sub>3</sub> ( <b>3</b> ) (CD <sub>3</sub> OD)                       | p. 10 |
| Table S7. NMR data of actinomycin Y <sub>4</sub> ( <b>4</b> ) (CD <sub>3</sub> OD)                       | p. 11 |
| Table S8. NMR data of actinomycin Y <sub>5</sub> ( <b>5</b> ) (CD <sub>3</sub> OD)                       | p. 12 |
| Figure S4. <sup>1</sup> H NMR spectrum of actinomycin Y <sub>1</sub> ( <b>1</b> ) (CDCl <sub>3</sub> )   | p. 13 |
| Figure S5. <sup>13</sup> C NMR spectrum of actinomycin Y <sub>1</sub> ( <b>1</b> ) (CDCl <sub>3</sub> ). | p. 14 |
| Figure S6. <sup>1</sup> H NMR spectrum of actinomycin Y <sub>2</sub> ( <b>2</b> ) (CD <sub>3</sub> OD)   | p. 15 |
| Figure S7. <sup>1</sup> H NMR spectrum of actinomycin Y <sub>3</sub> ( <b>3</b> ) (CD <sub>3</sub> OD)   | p. 16 |
| Figure S8. <sup>13</sup> C NMR spectrum of actinomycin Y <sub>3</sub> ( <b>3</b> ) (CD <sub>3</sub> OD)  | p. 17 |
| Figure S9. <sup>1</sup> H NMR spectrum of actinomycin Y <sub>4</sub> ( <b>4</b> ) (CD <sub>3</sub> OD)   | p. 18 |
| Figure S10. <sup>13</sup> C NMR spectrum of actinomycin Y <sub>4</sub> ( <b>4</b> ) (CD <sub>3</sub> OD) | p. 19 |
| Figure S11. <sup>1</sup> H NMR spectrum of actinomycin Y <sub>5</sub> ( <b>5</b> ) (CD <sub>3</sub> OD)  | p. 20 |
| Figure S12. <sup>13</sup> C NMR spectrum of actinomycin Y <sub>5</sub> ( <b>5</b> ) (CD <sub>3</sub> OD) | p. 21 |
| References and Notes                                                                                     | p. 22 |

## General Experimental Procedures

NMR spectra were recorded on Varian Inova 600 and Varian Inova 500 spectrometers at 298 K. Chemical shifts were determined relative to the solvent as internal standard ( $\text{CDCl}_3$   $\delta_H$  7.25,  $\delta_C$  77.0;  $\text{CD}_3\text{OD}$   $\delta_H$  3.30,  $\delta_C$  49.0). Optical rotation values were measured with a Perkin-Elmer 241 polarimeter. UV and CD spectra were obtained in methanol on a Varian Cary 3E spectrometer and Jasco J-500 spectrometer respectively. Infrared spectra were recorded on a Perkin-Elmer FTIR 1600 spectrometer as KBr pellets. ESIMS spectra were obtained on Finnigan LC-Q and high resolution ESIMS spectra on Bruker Apex-Q III (field strength 7 Tesla). TLC was done with silica gel 60 F<sub>254</sub> plates (Merck, 0.2 mm). Amino acid analysis was carried out on an Agilent 1100 HPLC system coupled with a Micromass LCT mass spectrometer in positive and negative ESI mode, using a Water Symmetry C18 column (3.5  $\mu\text{m}$ , 150  $\times$  2.1 mm) and a linear gradient from 5–40% MeCN (0.1% HCOOH, flow rate 0.5 mL/min) in 40 min.

## Chiral Amino Acid Analysis

The absolute configuration of the valine, threonine, and sarcosine residues was determined according to Marfey's method.<sup>1</sup> 1.0 mg of **1** was hydrolyzed in 6 N HCl (500  $\mu\text{L}$ ) for 20 h at RT. After drying under argon flow the residue was resolved in 200  $\mu\text{L}$  of acetone/ $\text{H}_2\text{O}$  (1:1). FDAA solution (1-fluoro-2,4-dinitrophenyl-5-L-alanine-amide, 100  $\mu\text{L}$ , 1% in acetone) and  $\text{Na}_2\text{CO}_3$  (20  $\mu\text{L}$ , 1M) were added and the mixture incubated for 1 h at 40 °C. After cooling to rt, 10  $\mu\text{L}$  of 2 N HCl were added and the solution directly applied to HPLC-MS as described above.

**Figure S1: Isolation scheme for actinomycins Y<sub>1</sub> – Y<sub>5</sub> (1 – 5) from 4 L fermentation broth**

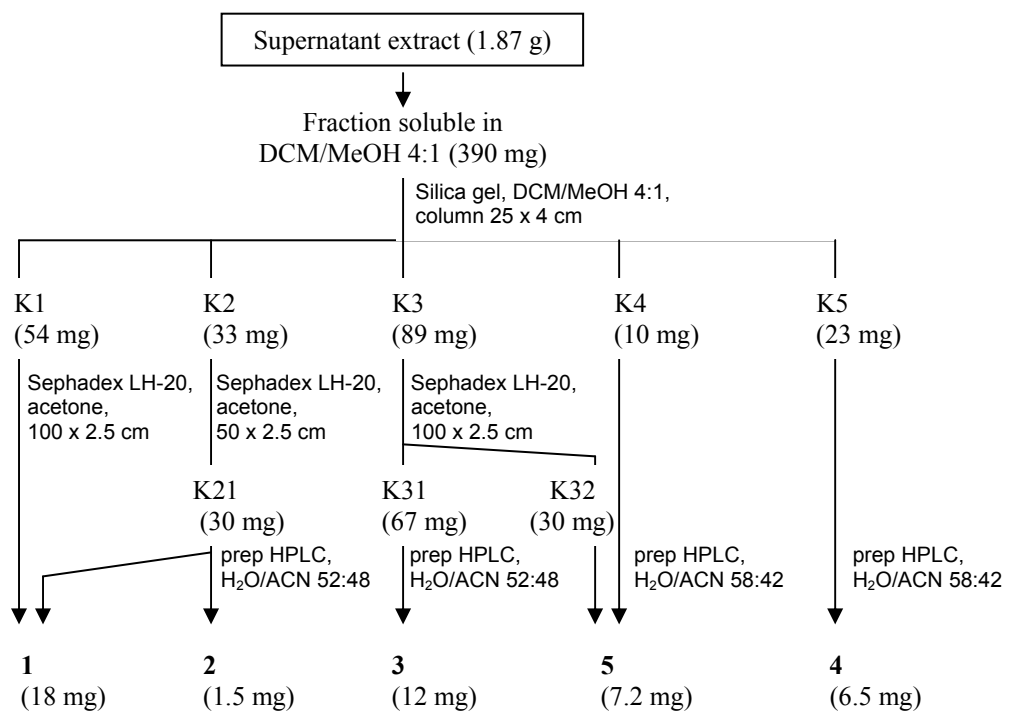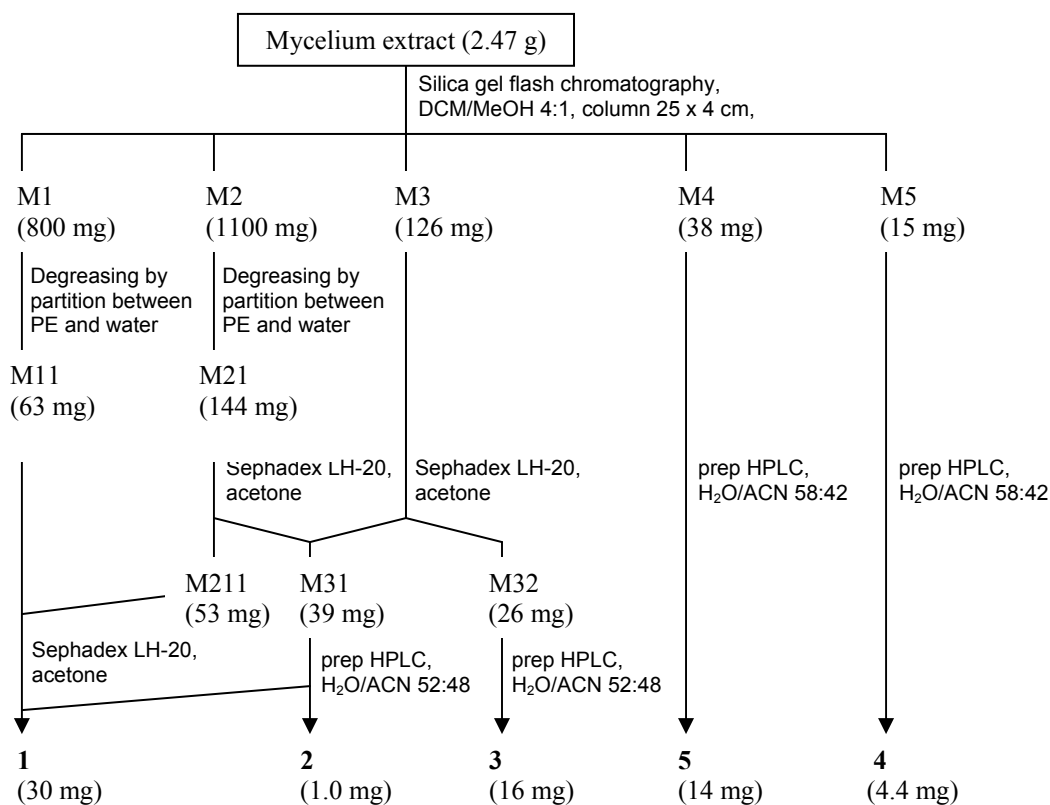

## Figure S2: Selected details of important spectroscopic data

Comparison of important HMBC correlations in the  $\beta$ -rings of actinomycins Y<sub>1</sub> (**1**) and Y<sub>3</sub> (**3**).

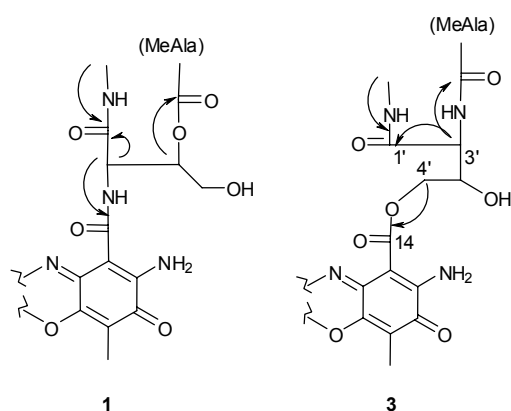

## Figure S3: Structural formulae of actinomycins D, G<sub>2</sub>, G<sub>3</sub> and G<sub>5</sub>

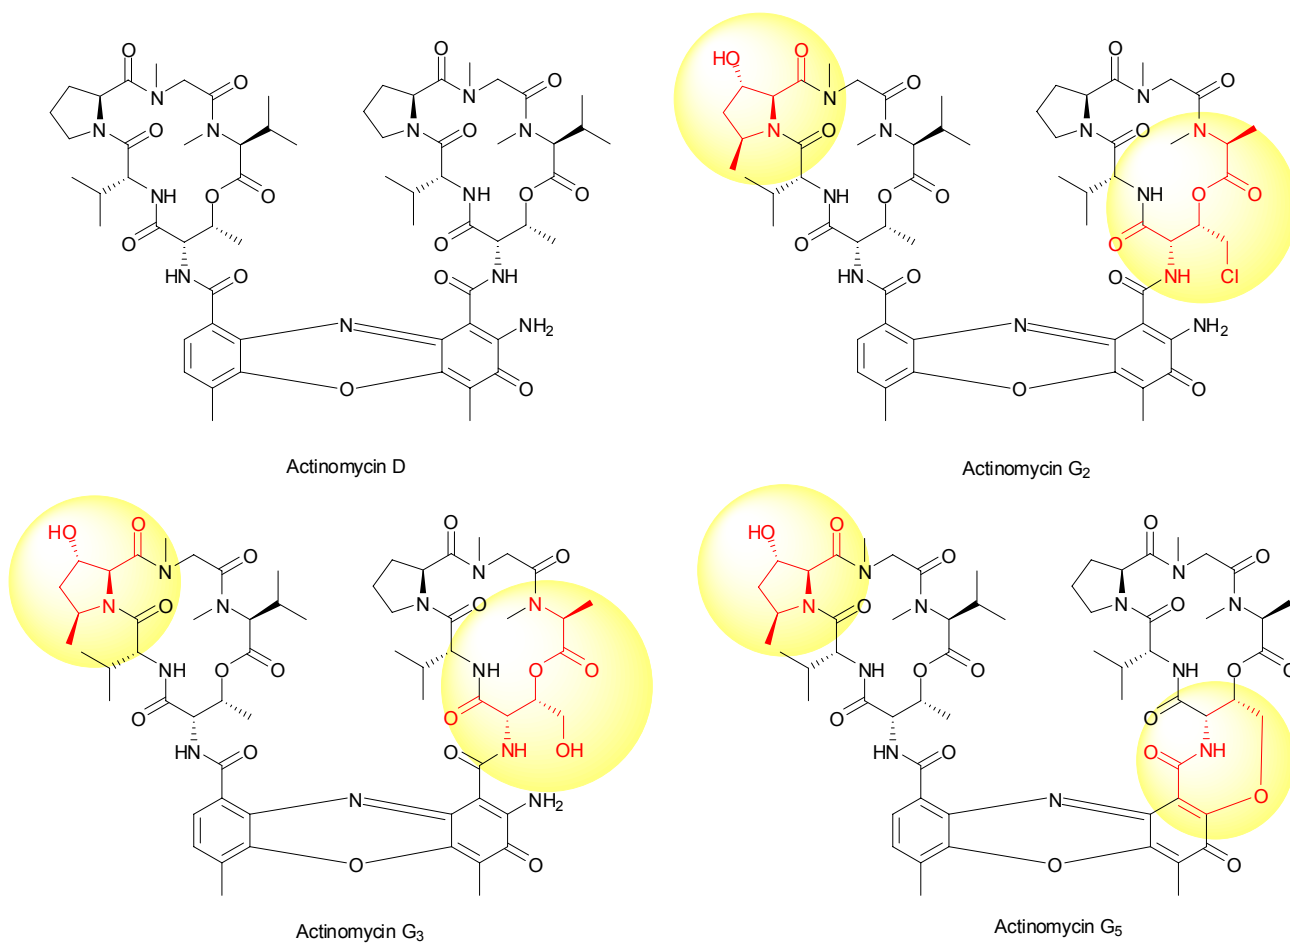

### Table S1: HM02 cell cycle investigation with actinomycin Y<sub>1</sub>

Cell cycle investigation with HM02 cells (% cells in the specified cell phase  $\pm$  standard deviation; concentration of test compounds 5 ng/mL).

| Cell phase                              | Sub G1 (apoptose) | G0/G1          | S              | G2/M           |
|-----------------------------------------|-------------------|----------------|----------------|----------------|
| Control                                 | 3.6 $\pm$ 1.3     | 54.5 $\pm$ 3.5 | 19.7 $\pm$ 0.8 | 21.5 $\pm$ 5   |
| Actinomycin D                           | 6.0 $\pm$ 3.4     | 54.0 $\pm$ 6.5 | 10.0 $\pm$ 1.6 | 29.2 $\pm$ 8.5 |
| Actinomycin Y <sub>1</sub> ( <b>1</b> ) | 1.7 $\pm$ 0.3     | 52.5 $\pm$ 1.5 | 13.9 $\pm$ 1.0 | 31.0 $\pm$ 2.0 |

### Table S2: Antiparasitic bioactivity of Y-type actinomycins

Antiparasitic bioactivity of actinomycins Y<sub>1</sub> (**1**) and Y<sub>3</sub> (**3**) compared with reference drugs. IC-50 values are given in  $\mu$ g/mL. No antiparasitic activity was found for compound **6**.

| Parasite                                | <i>T. b. rhod.</i> | <i>T. cruzi</i>    | <i>L. donovani</i> | <i>P. falciparum</i> |
|-----------------------------------------|--------------------|--------------------|--------------------|----------------------|
| Reference drug <sup>*)</sup>            | 0.003              | 0.305              | 0.343              | 0.062                |
| Actinomycin Y <sub>1</sub> ( <b>1</b> ) | 0.001              | dnp <sup>**)</sup> | 0.097              | 0.0001               |
| Actinomycin Y <sub>3</sub> ( <b>3</b> ) | 4.96               | >30                | >30                | 1.28                 |

<sup>\*)</sup> Melarsoprol (*T. b. rhodesiense*), benznidazole (*T. cruzi*), miltefosine (*L. donovani*), and chloroquine (*P. falciparum*), respectively.

<sup>\*\*)</sup> determination not possible due to cytotoxicity on macrophage cells.

**Table S3: Overview on naturally occurring actinomycins**

|                                                  | $\alpha$ -ring                                              | $\beta$ -ring                                               |
|--------------------------------------------------|-------------------------------------------------------------|-------------------------------------------------------------|
| <b>(1) Actinomycin D as core structure</b>       |                                                             |                                                             |
| Actinomycin D                                    | Thr-D-Val-Pro-Sar-MeVal                                     | Thr-D-Val-Pro-Sar-MeVal                                     |
| <b>(2) N-demethyl actinomycins<sup>2,3</sup></b> |                                                             |                                                             |
| Actinomycin D <sub>0</sub>                       | Thr-D-Val-Pro-Sar-MeVal                                     | Thr-D-Val-Pro- <b>Gly</b> -MeVal                            |
| N,N'-Didemethyl-actinomycin D                    | Thr-D-Val-Pro- <b>Gly</b> -MeVal                            | Thr-D-Val-Pro- <b>Gly</b> -MeVal                            |
| <b>(2) C-type actinomycins<sup>4-6</sup></b>     |                                                             |                                                             |
| Actinomycin C <sub>2</sub>                       | Thr-D-Val-Pro-Sar-MeVal                                     | Thr- <b>D-alle</b> -Pro-Sar-MeVal                           |
| Actinomycin C <sub>2a</sub>                      | Thr- <b>D-alle</b> -Pro-Sar-MeVal                           | Thr-D-Val-Pro-Sar-MeVal                                     |
| Actinomycin C <sub>3</sub>                       | Thr- <b>D-alle</b> -Pro-Sar-MeVal                           | Thr- <b>D-alle</b> -Pro-Sar-MeVal                           |
| <b>(3) F-type actinomycins<sup>7-9</sup></b>     |                                                             |                                                             |
| Actinomycin F <sub>8</sub>                       | Thr-D-Val- <b>Sar</b> -Sar-MeVal                            | Thr-D-Val- <b>Sar</b> -Sar-MeVal                            |
| Actinomycin F <sub>9</sub> <sup>a)</sup>         | Thr-D-Val- <b>Sar</b> -Sar-MeVal<br>Thr-D-Val-Pro-Sar-MeVal | Thr-D-Val-Pro-Sar-MeVal<br>Thr-D-Val- <b>Sar</b> -Sar-MeVal |
| <b>(4) X-type actinomycins<sup>10-13</sup></b>   |                                                             |                                                             |
| Actinomycin X <sub>0<math>\alpha</math></sub>    | Thr-D-Val- <b>Sar</b> -Sar-MeVal                            | Thr-D-Val- <b>Hyp</b> -Sar-MeVal                            |
| Actinomycin X <sub>0<math>\beta</math></sub>     | Thr-D-Val-Pro-Sar-MeVal                                     | Thr-D-Val- <b>Hyp</b> -Sar-MeVal                            |
| Actinomycin X <sub>0<math>\delta</math></sub>    | Thr-D-Val-Pro-Sar-MeVal                                     | Thr-D-Val- <b>aHyp</b> -Sar-MeVal                           |
| Actinomycin X <sub>1a</sub>                      | Thr-D-Val- <b>Sar</b> -Sar-MeVal                            | Thr-D-Val- <b>OPro</b> -Sar-MeVal                           |
| Actinomycin X <sub>2</sub>                       | Thr-D-Val-Pro-Sar-MeVal                                     | Thr-D-Val- <b>OPro</b> -Sar-MeVal                           |
| <b>(5) Z-type actinomycins<sup>14</sup></b>      |                                                             |                                                             |
| Actinomycin Z <sub>1</sub>                       | Thr-D-Val- <b>HMPro</b> -Sar-MeVal                          | <b>H</b> Thr-D-Val- <b>MOPro</b> -Sar- <b>MeAla</b>         |
| Actinomycin Z <sub>2</sub>                       | Thr-D-Val- <b>HMPro</b> -Sar-MeVal                          | Thr-D-Val- <b>MOPro</b> -Sar- <b>MeAla</b>                  |
| Actinomycin Z <sub>3</sub>                       | Thr-D-Val- <b>HMPro</b> -Sar-MeVal                          | <b>C</b> Thr-D-Val- <b>MOPro</b> -Sar- <b>MeAla</b>         |
| Actinomycin Z <sub>4</sub>                       | Thr-D-Val- <b>MPro</b> -Sar-MeVal                           | Thr-D-Val- <b>MOPro</b> -Sar- <b>MeAla</b>                  |
| Actinomycin Z <sub>5</sub>                       | Thr-D-Val- <b>MPro</b> -Sar-MeVal                           | <b>C</b> Thr-D-Val- <b>MOPro</b> -Sar- <b>MeAla</b>         |
| Actinomycin ZP <sup>15,b)</sup>                  | Thr-D-Val- <b>MPro</b> -Sar-MeVal                           | Thr-D-Val- <b>MPro</b> -Sar-MeVal                           |
| <b>(6) G-type actinomycins<sup>16,17</sup></b>   |                                                             |                                                             |
| Actinomycin G <sub>1</sub>                       | Thr-D-Val-Pro-Sar-MeVal                                     | <b>H</b> Thr-D-Val- <b>HMPro</b> -Sar- <b>MeAla</b>         |
| Actinomycin G <sub>2</sub>                       | Thr-D-Val- <b>HMPro</b> -Sar-MeVal                          | <b>C</b> Thr-D-Val-Pro-Sar- <b>MeAla</b>                    |
| Actinomycin G <sub>3</sub>                       | Thr-D-Val- <b>HMPro</b> -Sar-MeVal                          | <b>H</b> Thr-D-Val-Pro-Sar- <b>MeAla</b>                    |
| Actinomycin G <sub>4</sub>                       | Thr-D-Val- <b>HMPro</b> -Sar-MeVal                          | Thr-D-Val-Pro-Sar- <b>MeAla</b>                             |
| Actinomycin G <sub>5</sub>                       | Thr-D-Val- <b>HMPro</b> -Sar-MeVal                          | <b>c</b> Thr-D-Val-Pro-Sar- <b>MeAla</b>                    |
| Actinomycin G <sub>6</sub>                       | Thr-D-Val- <b>HMPro</b> -Sar-MeVal                          | <b>r</b> Thr-D-Val-Pro-Sar- <b>MeAla</b>                    |
| <b>(7) novel Y-type actinomycins</b>             |                                                             |                                                             |
| Actinomycin Y <sub>1</sub> (1)                   | Thr-D-Val- <b>HMPro</b> -Sar-MeVal                          | <b>C</b> Thr-D-Val- <b>OPro</b> -Sar- <b>MeAla</b>          |
| Actinomycin Y <sub>2</sub> (2)                   | Thr-D-Val- <b>HMPro</b> -Sar-MeVal                          | <b>C</b> Thr-D-Val- <b>Hyp</b> -Sar- <b>MeAla</b>           |
| Actinomycin Y <sub>3</sub> (3)                   | Thr-D-Val- <b>HMPro</b> -Sar-MeVal                          | <b>r</b> Thr-D-Val- <b>OPro</b> -Sar- <b>MeAla</b>          |
| Actinomycin Y <sub>4</sub> (4)                   | Thr-D-Val- <b>HMPro</b> -Sar-MeVal                          | <b>r</b> Thr-D-Val- <b>Hyp</b> -Sar- <b>MeAla</b>           |
| Actinomycin Y <sub>5</sub> (5)                   | Thr-D-Val- <b>HMPro</b> -Sar-MeVal                          | <b>c</b> Thr-D-Val- <b>OPro</b> -Sar- <b>MeAla</b>          |

Differences to actinomycin D are shown in **bold letters**. All amino acids are L-configured except when indicated otherwise. Abbreviations: MeVal = N-methylvaline, MeAla = N-methyl-L-alanine, alle = *allo*-isoleucine, Sar = sarcosine, MPro = *cis*-5-methylproline, HMPro = *trans*-3-hydroxy-*cis*-5-methylproline, Hyp = *trans*-4-hydroxyproline, OPro = 4-oxoproline, MOPro = *cis*-5-methyl-4-oxoproline, aHyp = *cis*-4-hydroxyproline, HThr = 4-hydroxythreonine, CThr = 4-chlorothreonine, cThr/cHThr = cyclic Thr or HThr, i.e. forming an additional ring closure to the chromophore, rHThr = rearrangement of the HThr ( $\beta$ -ring) connectivities.

a) Actinomycin F<sub>9</sub> consists of two isomers, which are also known as actinomycin III and IIIA = X<sub>0 $\gamma$</sub>  (sarcosine in  $\beta$ - or  $\alpha$ -ring, respectively)<sup>18</sup>. F<sub>0</sub> to F<sub>7</sub> were obtained by precursor-directed biosynthesis, exhibiting an additional variation at position 2' with alle.

b) Actinomycin ZP was isolated as the monomeric chromo-pentapeptidolactone protactin and was converted semisynthetically to actinomycin ZP by ferricyanide oxidation.<sup>15</sup>

**Table S4: Overview on actinomycins derived by precursor-directed biosynthesis**

**Feeding of L-isoleucine:**<sup>19, 20</sup>

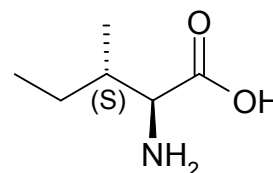

|                            | $\alpha$ -ring                    | $\beta$ -ring                     |
|----------------------------|-----------------------------------|-----------------------------------|
| Actinomycin E <sub>1</sub> | Thr- <b>D-alle</b> -Pro-Sar-MeVal | Thr- <b>D-alle</b> -Pro-Sar-Melle |
| Actinomycin E <sub>2</sub> | Thr- <b>D-alle</b> -Pro-Sar-Melle | Thr- <b>D-alle</b> -Pro-Sar-Melle |

(Melle = *N*-methyl-L-isoleucine, D-alle = D-*allo*-isoleucine)

**Feeding of L-leucine and L-isoleucine:**

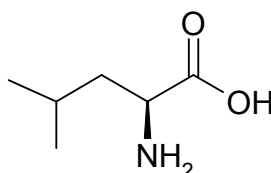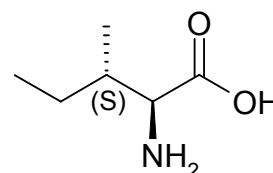

|                                            |                                   |                                   |
|--------------------------------------------|-----------------------------------|-----------------------------------|
| Actinomycin A <sub>u5</sub> <sup>21</sup>  | Thr- <b>D-Leu</b> -Pro-Sar-MeVal  | Thr- <b>D-Leu</b> -Pro-Sar-MeVal  |
| Actinomycin A <sub>u6a</sub>               | Thr- <b>D-alle</b> -Pro-Sar-MeVal | Thr- <b>D-Leu</b> -Pro-Sar-MeVal  |
| Actinomycin A <sub>u6b</sub> <sup>22</sup> | Thr- <b>D-Leu</b> -Pro-Sar-MeVal  | Thr- <b>D-alle</b> -Pro-Sar-MeVal |
| Actinomycin A <sub>u7a</sub>               | Thr- <b>D-Leu</b> -Pro-Sar-MeVal  | Thr- <i>D</i> -Val-Pro-Sar-MeVal  |
| Actinomycin A <sub>u7b</sub> <sup>23</sup> | Thr- <i>D</i> -Val-Pro-Sar-MeVal  | Thr- <b>D-Leu</b> -Pro-Sar-MeVal  |

Remark: Actinomycin A<sub>u7b</sub> was also found to occur naturally and named actinomycin C<sub>3a</sub>, but results were not published.<sup>24</sup>

**Feeding of sarcosine:**<sup>8</sup>

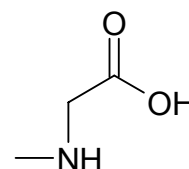

|                            |                                           |                                   |
|----------------------------|-------------------------------------------|-----------------------------------|
| Actinomycin F <sub>1</sub> | Thr- <i>D</i> -Val- <b>Sar</b> -Sar-MeVal | Thr- <b>D-alle</b> -Sar-Sar-MeVal |
| Actinomycin F <sub>2</sub> | Thr- <i>D</i> -Val-Pro-Sar-MeVal          | Thr- <b>D-alle</b> -Sar-Sar-MeVal |
| Actinomycin F <sub>3</sub> | Thr- <b>D-alle</b> -Sar-Sar-MeVal         | Thr- <b>D-alle</b> -Sar-Sar-MeVal |
| Actinomycin F <sub>4</sub> | Thr- <b>D-alle</b> -Pro-Sar-MeVal         | Thr- <b>D-alle</b> -Sar-Sar-MeVal |

Remark: The chemical structures of F<sub>0</sub>, F<sub>5</sub>, F<sub>6</sub> and F<sub>7</sub> are either not known or not published.

**Feeding of (4*R*)- and (4*S*)-4-methyl-L-proline:**<sup>25</sup>

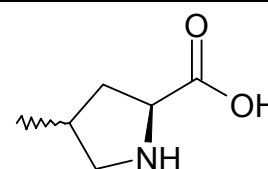

cis-4-methyl-L-proline:

|                             |                                            |                                            |
|-----------------------------|--------------------------------------------|--------------------------------------------|
| Actinomycin K <sub>1c</sub> | Thr- <i>D</i> -Val-Pro-Sar-MeVal           | Thr- <i>D</i> -Val- <b>MPro</b> -Sar-MeVal |
| Actinomycin K <sub>2c</sub> | Thr- <i>D</i> -Val- <b>MPro</b> -Sar-MeVal | Thr- <i>D</i> -Val- <b>MPro</b> -Sar-MeVal |

trans-4-methyl-L-proline:

|                             |                                            |                                            |
|-----------------------------|--------------------------------------------|--------------------------------------------|
| Actinomycin K <sub>1t</sub> | Thr- <i>D</i> -Val-Pro-Sar-MeVal           | Thr- <i>D</i> -Val- <b>MPro</b> -Sar-MeVal |
| Actinomycin K <sub>2t</sub> | Thr- <i>D</i> -Val- <b>MPro</b> -Sar-MeVal | Thr- <i>D</i> -Val- <b>MPro</b> -Sar-MeVal |

**Feeding of (4R)- and (4S)-4-chloro-L-proline:<sup>26</sup>**

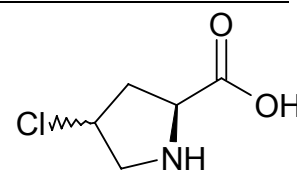

cis-4-chloro-L-proline:

no trivial name (\*)

Thr-D-Val-Pro-Sar-MeVal

Thr-D-Val-**CIPro**-Sar-MeVal

no trivial name

Thr-D-Val-**CIPro**-Sar-MeVal

Thr-D-Val-**CIPro**-Sar-MeVal

trans-4-chloro-L-proline:

no trivial name (\*)

Thr-D-Val-Pro-Sar-MeVal

Thr-D-Val-**CIPro**-Sar-MeVal

**Feeding of pipercolid acid:<sup>27</sup>**

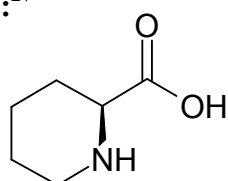

Pipercolid acid (Pip)

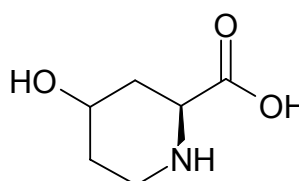

4-Hydroxy- (HPip)

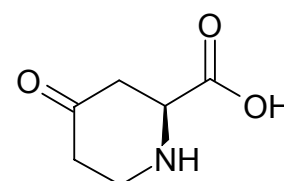

4-Oxo- (OPip)

Actinomycin Pip 1<sub>α</sub> (\*)

Thr-D-Val-**Pip**-Sar-MeVal

Thr-D-Val-**OPip**-Sar-MeVal

Actinomycin Pip 1<sub>β</sub> (\*)

Thr-D-Val-**Pip**-Sar-MeVal

Thr-D-Val-Pro-Sar-MeVal

Actinomycin Pip 1<sub>γ</sub> (\*)

Thr-D-Val-**Pip**-Sar-MeVal

Thr-D-Val-**HPip**-Sar-MeVal

Actinomycin Pip 1<sub>δ</sub> (\*)

Thr-D-Val-Pro-Sar-MeVal

Thr-D-Val-**OPip**-Sar-MeVal

Actinomycin Pip 1<sub>ε</sub> (\*)

Thr-D-Val-Pro-Sar-MeVal

Thr-D-Val-**HPip**-Sar-MeVal

Actinomycin Pip 2 (\*)

Thr-D-Val-**Pip**-Sar-MeVal

Thr-D-Val-**Pip**-Sar-MeVal

**Feeding of thiazolidin-4-carboxylic acid:<sup>28</sup>**

Incorporation of thiazolidin-4-carboxylic acid into two novel actinomycins was proven by <sup>35</sup>S-isotopic labelling experiments. The structure of the compounds was not elucidated. Presumably and analogous to the azetomycins, thiazolidine-4-carboxylic acid is expected to provoke both single and double incorporation.

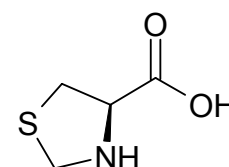

**Feeding of azetidin-2-carboxylic acid:<sup>29, 30</sup>**

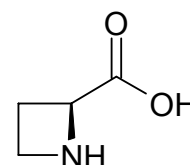

Azetomycin I (\*)

Thr-D-Val-Pro-Sar-MeVal

Thr-D-Val-**AzC**-Sar-MeVal

Azetomycin II

Thr-D-Val-**AzC**-Sar-MeVal

Thr-D-Val-**AzC**-Sar-MeVal

(\*) the marked compounds were not investigated whether incorporation was in the α- or β-ring. Presumably, the compounds were mixtures of both possibilities.



**Table S5.** NMR data of actinomycin Y<sub>2</sub> (**2**) <sup>1</sup>H: 600 MHz, <sup>13</sup>C: see footnote\*, CD<sub>3</sub>OD

| <b>Pentapeptidolactones</b>     |      |              |            |              |                                |      |              |               |               |   |
|---------------------------------|------|--------------|------------|--------------|--------------------------------|------|--------------|---------------|---------------|---|
| <b><math>\alpha</math>-ring</b> | pos. | $\delta_C^*$ | $\delta_H$ | $J$ [Hz]     | <b><math>\beta</math>-ring</b> | pos. | $\delta_C^*$ | $\delta_H$    | $J$ [Hz]      |   |
| Thr                             | 1    | 170.3        | –          | –            | ClThr                          | 1    | 169.7        | –             | –             |   |
|                                 | 2    | 56.4         | 4.63       | d, 2.9       |                                | 2    | 54.0         | 5.36          | d             |   |
|                                 | 3    | 75.4         | 5.27       | qd, 6.3, 3.0 |                                | 3    | 72.3         | 5.15          | m             |   |
|                                 | 4    | 17.1         | 1.31       | d, 6.3       |                                | 4    | 43.0         | 3.85          | m             |   |
|                                 |      |              |            |              |                                |      | 3.90         | m             |               |   |
| D-Val                           | 1    | 175.3        | –          | –            | D-Val                          | 1    | 171.5        | –             | –             |   |
|                                 | 2    | 58.7         | 3.76       | d, 9.5       |                                | 2    | 60.4         | 3.52          | d, 10.1       |   |
|                                 | 3    | 33.0         | 2.09       | m            |                                | 3    | 32.8         | 2.11          | m             |   |
|                                 | 4    | 19.4         | 1.13       | d, 6.7       |                                | 4    | 19.6         | 0.88          | d, 6.9        |   |
|                                 | 5    | 19.4         | 0.90       | d, 6.9       |                                | 5    | 19.3         | 1.11          | d, 6.7        |   |
| HMPro                           | 1    | 169.6        | –          | –            | Hyp                            | 1    | 173.3        | –             | –             |   |
|                                 | 2    | 69.2         | 6.24       | s            |                                | 2    | 58.0         | 6.12          | d, 9.3        |   |
|                                 | 3    | 76.6         | 4.11       | m            |                                | 3    | 39.6         | 2.05          | m             |   |
|                                 | 4    | 41.7         | 2.01       | m            |                                |      |              | 2.86          | m             |   |
|                                 |      |              |            | 2.29         |                                | m    | 4            | 68.8          | 4.69          | m |
|                                 | 5    | 55.1         | 4.99       | m            |                                | 5    | 54.4         | 3.68          | dd, 11.8, 7.8 |   |
|                                 | 6    | 19.0         | 1.49       | d, 6.0       |                                |      | 3.87         | dd, 11.6, 4.9 |               |   |
| Sar                             | 1    | 168.4        | –          | –            | Sar                            | 1    | 168.7        | –             | –             |   |
|                                 | 2    | 52.6         | 4.04       | d, 17.7      |                                | 2    | 52.3         | 3.94          | d, 17.9       |   |
|                                 |      |              | 4.72       | d, 18.0      |                                |      |              | 4.79          | d, 17.7       |   |
|                                 | NMe  | 35.2         | 2.86       | s            |                                | NMe  | 35.2         | 2.84          | s             |   |
| MeVal                           | 1    | 170.0        | –          | –            | MeAla                          | 1    | 171.2        | –             | –             |   |
|                                 | 2    | 71.9         | 3.00       | d, 9.3       |                                | 2    | 60.6         | 3.61          | q, 6.8        |   |
|                                 | 3    | 28.3         | 2.58       | m            |                                | 3    | 13.3         | 1.30          | d, 6.9        |   |
|                                 | 4    | 21.4         | 0.98       | d, 6.6       |                                |      |              | 2.94          | s             |   |
|                                 | 5    | 19.1         | 0.79       | d, 6.9       |                                | NMe  | 36.6         | 2.94          | s             |   |
|                                 |      | NMe          | 39.9       | 3.00         |                                | s    |              |               |               |   |

### Chromophore

$\delta_H$  2.22 (s, 3H, 12-H<sub>3</sub>), 2.56 (s, 3H, 11-H<sub>3</sub>), 7.43 (d,  $J = 7.7$  Hz, 1H, 7-H), 7.49 (d,  $J = 7.6$  Hz, 1H, 8-H).

$\delta_C$  7.4 (CH<sub>3</sub>, C-12), 14.6 (CH<sub>3</sub>, C-11), 113.7 (C, C-4), 126.1 (CH, C-8), 128.2 (C, C-6), 130.7 (C, C-9a), 131.6 (CH, C-7), 133.2 (C, C-9), 141.2 (C, C-5a), 146.2 (C, C-4a), 168.8 (C, C-13), 169.1 (C, C-14), 179.8 (C, C-3). C-1, C-2, and C-10a were not obtainable from HSQC/HMBC data.\*

\* Due to only low amount, <sup>13</sup>C chemical shifts were obtained from HSQC and HMBC experiments instead of recording a 1D <sup>13</sup>C NMR spectrum.

**Table S6.** NMR data of actinomycin Y<sub>3</sub> (**3**) <sup>1</sup>H: 600 MHz, <sup>13</sup>C: 150.8 MHz, CD<sub>3</sub>OD

| <b>Pentapeptidolactones</b>     |      |            |            |                     |                                |                     |            |               |                    |   |
|---------------------------------|------|------------|------------|---------------------|--------------------------------|---------------------|------------|---------------|--------------------|---|
| <b><math>\alpha</math>-ring</b> | pos. | $\delta_C$ | $\delta_H$ | <i>J</i> [Hz]       | <b><math>\beta</math>-ring</b> | pos.                | $\delta_C$ | $\delta_H$    | <i>J</i> [Hz]      |   |
| Thr                             | 1    | 171.3      | –          | –                   | HThr                           | 1                   | 171.5      | –             | –                  |   |
|                                 | 2    | 57.8       | 5.09       | d, 2.5              |                                | 2                   | 55.5       | 4.68          | d, 2.5             |   |
|                                 | 3    | 74.1       | 5.36       | qd, 6.5, 2.5        |                                | 3                   | 68.9       | 4.57          | ddd, 8.0, 6.0, 2.5 |   |
|                                 | 4    | 17.7       | 1.42       | d, 6.0              |                                | 4                   | 66.9       | 4.14          | dd, 11.0, 8.0      |   |
|                                 |      |            |            |                     |                                |                     | 4.33       | dd, 11.0, 6.0 |                    |   |
| D-Val                           | 1    | 174.4      | –          | –                   | D-Val                          | 1                   | 172.4      | –             | –                  |   |
|                                 | 2    | 59.8       | 3.55       | d, 9.8              |                                | 2                   | 59.1       | 4.27          | d, 9.5             |   |
|                                 | 3    | 32.5       | 2.03       | d hept, 10.0, 6.5   |                                | 3                   | 30.1       | 2.14          | d hept, 10.0, 6.5  |   |
|                                 | 4    | 19.8       | 1.05       | d, 6.5              |                                | 4                   | 19.8       | 0.92          | d, 6.5             |   |
|                                 | 5    | 19.7       | 0.84       | d, 6.5              |                                | 5                   | 18.8       | 0.91          | d, 6.5             |   |
| HMPro                           | 1    | 173.6      | –          | –                   | OPro                           | 1                   | 174.6      | –             | –                  |   |
|                                 | 2    | 67.4       | 6.21       | s                   |                                | 2                   | 54.4       | 5.54          | dd, 9.0, 1.0       |   |
|                                 | 3    | 75.9       | 4.24       | m                   |                                | 3                   | 40.1       | 2.44          | m                  |   |
|                                 | 4    | 40.9       | 1.88       | ddd, 12.5, 7.5, 5.0 |                                |                     |            | 4.01          | m                  |   |
|                                 |      |            |            | 1.97                |                                | ddd, 12.5, 7.0, 4.0 | 4          | 209.9         | –                  | – |
|                                 | 5    | 54.6       | 4.32       | m                   |                                | 5                   | 54.4       | 4.03          | d, 18.0            |   |
|                                 | 6    | 19.3       | 1.33       | d, 6.0              |                                |                     | 4.28       | d, 18.0       |                    |   |
| Sar                             | 1    | 168.8      | –          | –                   | Sar                            | 1                   | 172.9      | –             | –                  |   |
|                                 | 2    | 53.1       | 4.03       | d, 18.0             |                                | 2                   | 51.8       | 3.39          | d, 15.0            |   |
|                                 |      |            | 5.02       | d, 18.0             |                                |                     | 4.71       | d, 15.0       |                    |   |
|                                 | NMe  | 35.8       | 2.88       | s                   |                                | NMe                 | 38.9       | 3.38          | s                  |   |
| MeVal                           | 1    | 170.1      | –          | –                   | MeAla                          | 1                   | 174.2      | –             | –                  |   |
|                                 | 2    | 71.9       | 3.16       | d, 9.5              |                                | 2                   | 55.9       | 4.95          | q, 7.0             |   |
|                                 | 3    | 28.2       | 2.64       | d hept, 9.5, 6.5    |                                | 3                   | 15.2       | 1.42          | d, 7.5             |   |
|                                 | 4    | 22.0       | 1.05       | d, 6.5              |                                | NMe                 | 31.9       | 3.11          | s                  |   |
|                                 | 5    | 19.4       | 0.84       | d, 6.5              |                                |                     |            |               |                    |   |
|                                 | NMe  | 39.3       | 3.04       | s                   |                                |                     |            |               |                    |   |

### Chromophore

$\delta_H$  2.15 (s, 3H, 12-H<sub>3</sub>), 2.51 (s, 3H, 11-H<sub>3</sub>), 7.39 (d, *J* = 7.5 Hz, 1H, 7-H), 7.78 (d, *J* = 7.5 Hz, 1H, 8-H).

$\delta_C$  7.9 (CH<sub>3</sub>, C-12), 15.1 (CH<sub>3</sub>, C-11), 98.4 (C, C-1), 114.5 (C, C-4), 126.8 (CH, C-8), 130.2 (C, C-9), 130.3 (C, C-6), 131.1 (CH, C-7), 132.0 (C, C-9a), 141.9 (C, C-5a), 147.1 (C, C-10a), 147.4 (C, C-4a), 150.4 (C, C-2), 167.9 (C, C-14), 168.7 (C, C-13), 179.7 (C, C-3).

**Table S7.** NMR data of actinomycin Y<sub>4</sub> (**4**) <sup>1</sup>H: 600 MHz, <sup>13</sup>C: 150.8 MHz, CD<sub>3</sub>OD

| <b>Pentapeptidolactones</b> |      |                |                |               |               |      |                |                |               |   |
|-----------------------------|------|----------------|----------------|---------------|---------------|------|----------------|----------------|---------------|---|
| <b>α-ring</b>               | pos. | δ <sub>C</sub> | δ <sub>H</sub> | <i>J</i> [Hz] | <b>β-ring</b> | pos. | δ <sub>C</sub> | δ <sub>H</sub> | <i>J</i> [Hz] |   |
| Thr                         | 1    | 171.3          | –              | –             | HThr          | 1    | 171.7          | –              | –             |   |
|                             | 2    | 58.1           | 4.99           | d, 2.0        |               | 2    | 54.8           | 4.72           | d, 3.5        |   |
|                             | 3    | 74.0           | 5.35           | qd, 7.0, 2.0  |               | 3    | 70.2           | 4.33           | m             |   |
|                             | 4    | 17.9           | 1.46           | d, 7.0        |               | 4    | 67.0           | 4.25           | dd, 11.0, 8.5 |   |
| D-Val                       | 1    | 174.3          | –              | –             | D-Val         | 1    | 172.3          | –              | –             |   |
|                             | 2    | 59.9           | 3.54           | d, 10.0       |               | 2    | 59.1           | 4.36           | d, 11.0       |   |
|                             | 3    | 32.5           | 2.04           | m             |               | 3    | 30.4           | 2.09           | m             |   |
|                             | 4    | 19.8           | 1.04           | d, 6.5        |               | 4    | 19.7           | 0.92           | d, 6.5        |   |
|                             | 5    | 19.5           | 0.84           | d, 6.5        |               | 5    | 19.1           | 0.93           | d, 6.5        |   |
| HMPro                       | 1    | 173.5          | –              | –             | Hyp           | 1    | 175.4          | –              | –             |   |
|                             | 2    | 67.5           | 6.23           | s             |               | 2    | 56.7           | 5.05           | t, 8.0        |   |
|                             | 3    | 75.8           | 4.20           | m             |               | 3    | 37.5           | 2.00           | m             |   |
|                             | 4    | 40.9           | 1.88           | m             |               |      |                | 2.24           | m             |   |
|                             |      |                |                | 1.95          |               | m    | 4              | 71.6           | 4.51          | m |
|                             | 5    | 54.6           | 4.31           | m             |               | 5    | 57.3           | 3.62           | d, 11.0       |   |
| Sar                         | 1    | 168.8          | –              | –             | Sar           | 1    | 172.3          | –              | –             |   |
|                             | 2    | 53.1           | 4.00           | d, 18.0       |               | 2    | 51.8           | 3.36           | m             |   |
|                             |      |                | 4.99           | d, 18.0       |               |      |                | 4.57           | d, 14.5       |   |
|                             | NMe  | 35.8           | 2.86           | s             |               | NMe  | 38.9           | 3.34           | s             |   |
| MeVal                       | 1    | 170.0          | –              | –             | MeAla         | 1    | 173.7          | –              | –             |   |
|                             | 2    | 71.9           | 3.18           | m             |               | 2    | 54.3           | 5.32           | q, 7.0        |   |
|                             | 3    | 28.2           | 2.66           | m             |               | 3    | 14.6           | 1.41           | d, 7.0        |   |
|                             | 4    | 22.2           | 1.09           | d, 6.5        |               |      |                | 3.11           | s             |   |
|                             | 5    | 19.6           | 0.85           | d, 6.5        |               |      |                |                |               |   |
|                             | NMe  | 39.3           | 3.01           | s             |               |      |                |                |               |   |

**Chromophore**

δ<sub>H</sub> 2.17 (s, 3H, 12-H<sub>3</sub>), 2.51 (s, 3H, 11-H<sub>3</sub>), 7.40 (d, *J* = 7.5 Hz, 1H, 7-H), 7.81 (d, *J* = 7.5 Hz, 1H, 8-H).

δ<sub>C</sub> 7.9 (CH<sub>3</sub>, C-12), 14.6 (CH<sub>3</sub>, C-11), 98.6 (C, C-1), 114.6 (C, C-4), 127.0 (CH, C-8), 129.8 (C, C-9), 130.4 (C, C-6), 131.1 (CH, C-7), 132.0 (C, C-9a), 141.9 (C, C-5a), 147.3 (C, C-4a), 147.3 (C, C-10a), 149.9 (C, C-2), 167.3 (C, C-14), 168.6 (C, C-13), 179.7 (C, C-3).

**Table S8.** NMR data of actinomycin Y<sub>5</sub> (**5**) <sup>1</sup>H: 600 MHz, <sup>13</sup>C: 150.8 MHz, CD<sub>3</sub>OD

| Pentapeptidolactone |      |            |            |              | Cyclopentapeptide |         |            |            |          |      |
|---------------------|------|------------|------------|--------------|-------------------|---------|------------|------------|----------|------|
| $\alpha$ -ring      | pos. | $\delta_C$ | $\delta_H$ | $J$ [Hz]     | $\beta$ -ring     | pos.    | $\delta_C$ | $\delta_H$ | $J$ [Hz] |      |
| Thr                 | 1    | 170.5      | –          | –            | HThr              | 1       | 169.0      | –          | –        |      |
|                     | 2    | 56.4       | 4.83       | m            |                   | 2       | 54.7       | 5.22       | m        |      |
|                     | 3    | 74.5       | 5.33       | qd, 6.0, 2.3 |                   | 3       | 70.1       | 5.04       | m        |      |
|                     | 4    | 16.3       | 1.26       | d, 6.0       |                   | 4       | 45.3       | 2.78       | m        |      |
|                     |      |            |            |              |                   |         |            | 3.10       | m        |      |
| D-Val               | 1    | 174.0      | –          | –            | D-Val             | 1       | 172.4      | –          | –        |      |
|                     | 2    | 60.4       | 3.71       | m            |                   | 2       | 57.8       | 4.05       | d, 10.7  |      |
|                     | 3    | 33.0       | 2.04       | m            |                   | 3       | 32.4       | 2.22       | m        |      |
|                     | 4    | 19.4       | 1.09       | d, 6.8       |                   | 4       | 19.6       | 0.89       | d, 6.9   |      |
|                     | 5    | 19.2       | 0.91       | d, 6.9       |                   | 5       | 18.8       | 1.18       | d, 6.9   |      |
| HMPro               | 1    | 172.4      | –          | –            | OPro              | 1       | 174.9      | –          | –        |      |
|                     | 2    | 69.1       | 6.30       | s            |                   | 2       | 57.1       | 5.64       | m        |      |
|                     | 3    | 74.7       | 4.27       | m            |                   | 3       | 40.3       | 2.33       | m        |      |
|                     | 4    | 40.6       | 1.92       | m            |                   |         |            |            | 3.92     | m    |
|                     |      |            |            | 1.96         |                   | m       | 4          | 209.5      | –        | –    |
|                     | 5    | 55.2       | 4.24       | m            |                   | 5       | 53.8       | 3.89       | d, 19.2  |      |
|                     | 6    | 18.6       | 1.45       | d, 6.0       |                   |         |            | 4.43       | d, 19.2  |      |
| Sar                 | 1    | 168.1      | –          | –            | Sar               | 1       | 169.5      | –          | –        |      |
|                     | 2    | 52.6       | 4.05       | d, 18.0      |                   | 2       | 52.5       | 4.00       | d, 18.0  |      |
|                     |      |            |            | 4.81         |                   | d, 18.0 |            |            |          | 4.69 |
|                     | NMe  | 35.2       | 2.88       | s            |                   | NMe     | 35.2       | 2.88       | s        |      |
| MeVal               | 1    | 169.9      | –          | –            | MeAla             | 1       | 170.5      | –          | –        |      |
|                     | 2    | 71.8       | 3.07       | m            |                   | 2       | 60.8       | 3.60       | q, 7.0   |      |
|                     | 3    | 28.9       | 2.60       | m            |                   | 3       | 13.5       | 1.42       | d, 6.5   |      |
|                     | 4    | 21.5       | 0.99       | d, 6.5       |                   |         |            |            |          |      |
|                     | 5    | 19.1       | 0.80       | d, 6.5       |                   | NMe     | 36.9       | 2.94       | s        |      |
|                     |      | NMe        | 39.3       | 3.03         |                   | s       |            |            |          |      |

### Chromophore

$\delta_H$  2.21 (s, 3H, 12-H<sub>3</sub>), 2.54 (s, 3H, 11-H<sub>3</sub>), 7.43 (d,  $J = 7.5$  Hz, 1H, 8-H), 7.44 (d,  $J = 7.5$  Hz, 1H, 7-H).

$\delta_C$  7.9 (CH<sub>3</sub>, C-12), 15.0 (CH<sub>3</sub>, C-11), 102.6 (C, C-1), 115.4 (C, C-4), 127.0 (CH, C-8), 128.7 (C, C-6), 130.2 (C, C-9), 131.6 (CH, C-7), 132.2 (C, C-9a), 141.4 (C, C-5a), 145.0 (C, C-4a), 147.1 (C, C-10a), 151.2 (C, C-2), 167.9 (C, C-13), 174.9 (C, C-14), 178.5 (C, C-3).

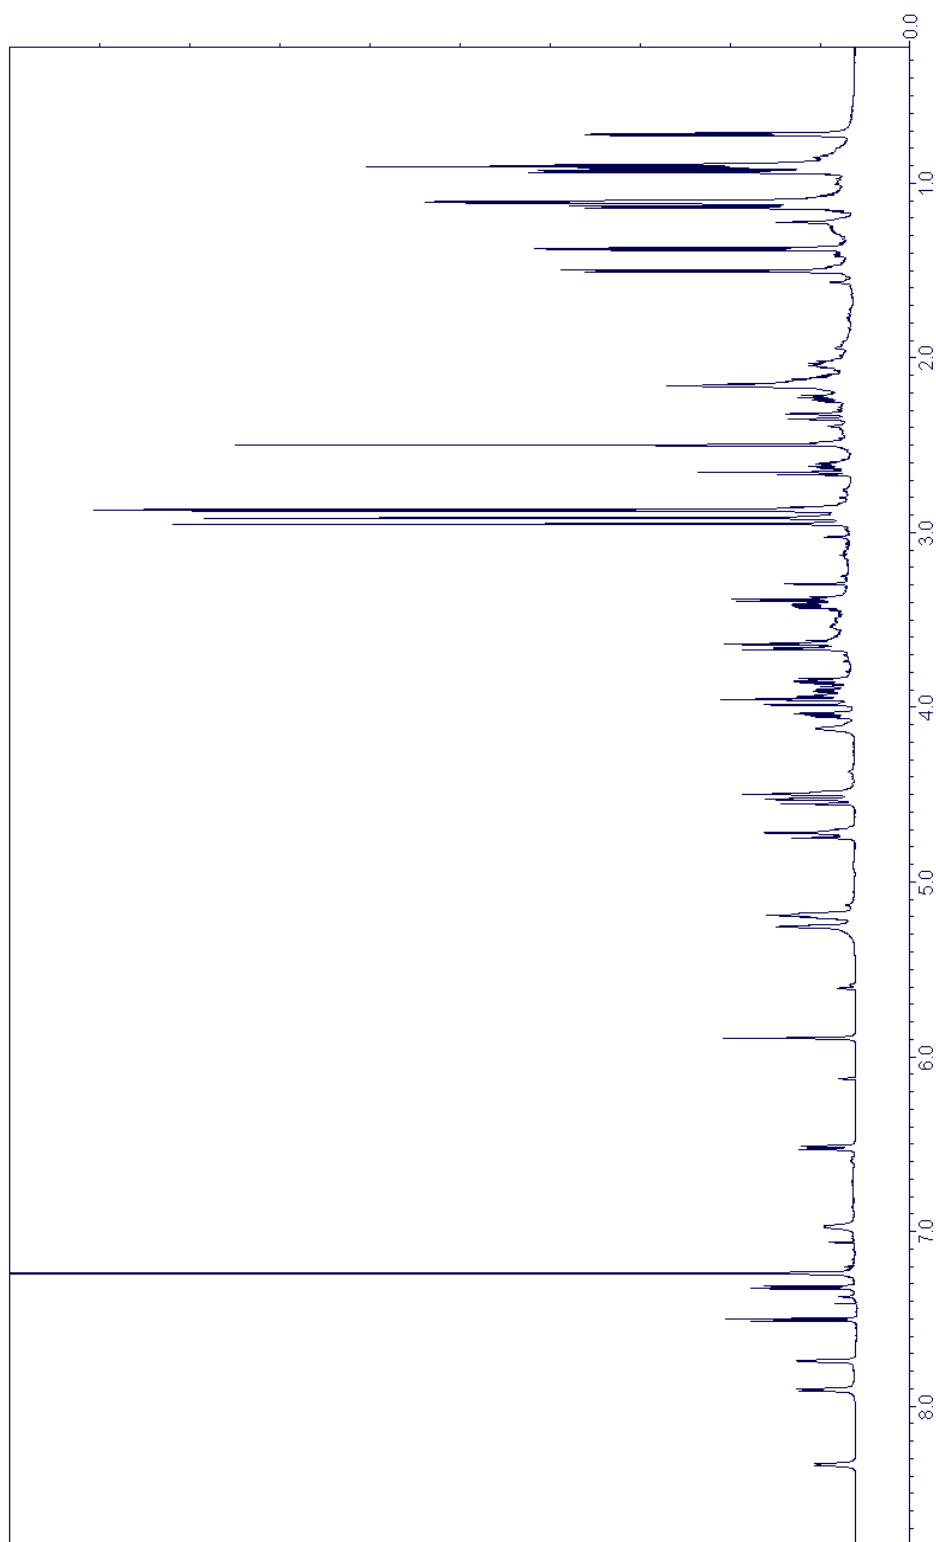

**Figure S4:**  $^1\text{H}$  NMR spectrum of actinomycin  $\text{Y}_1$  (**1**) ( $\text{CDCl}_3$ , 600 MHz).

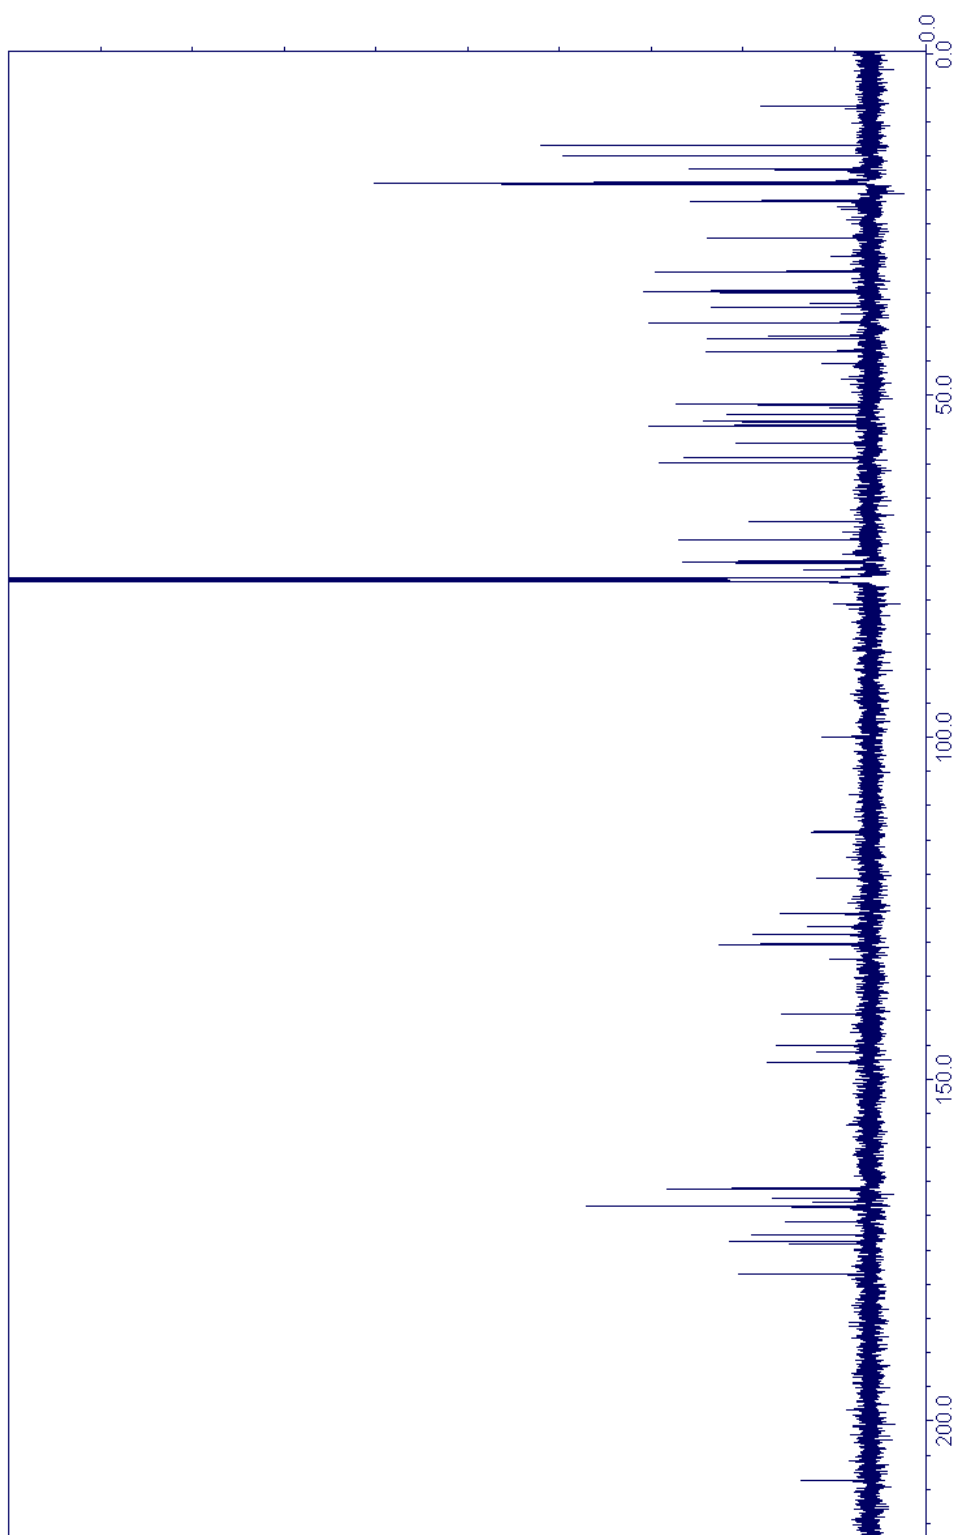

**Figure S5:**  $^{13}\text{C}$  NMR spectrum of actinomycin  $\text{Y}_1$  (1) ( $\text{CDCl}_3$ , 150 MHz).

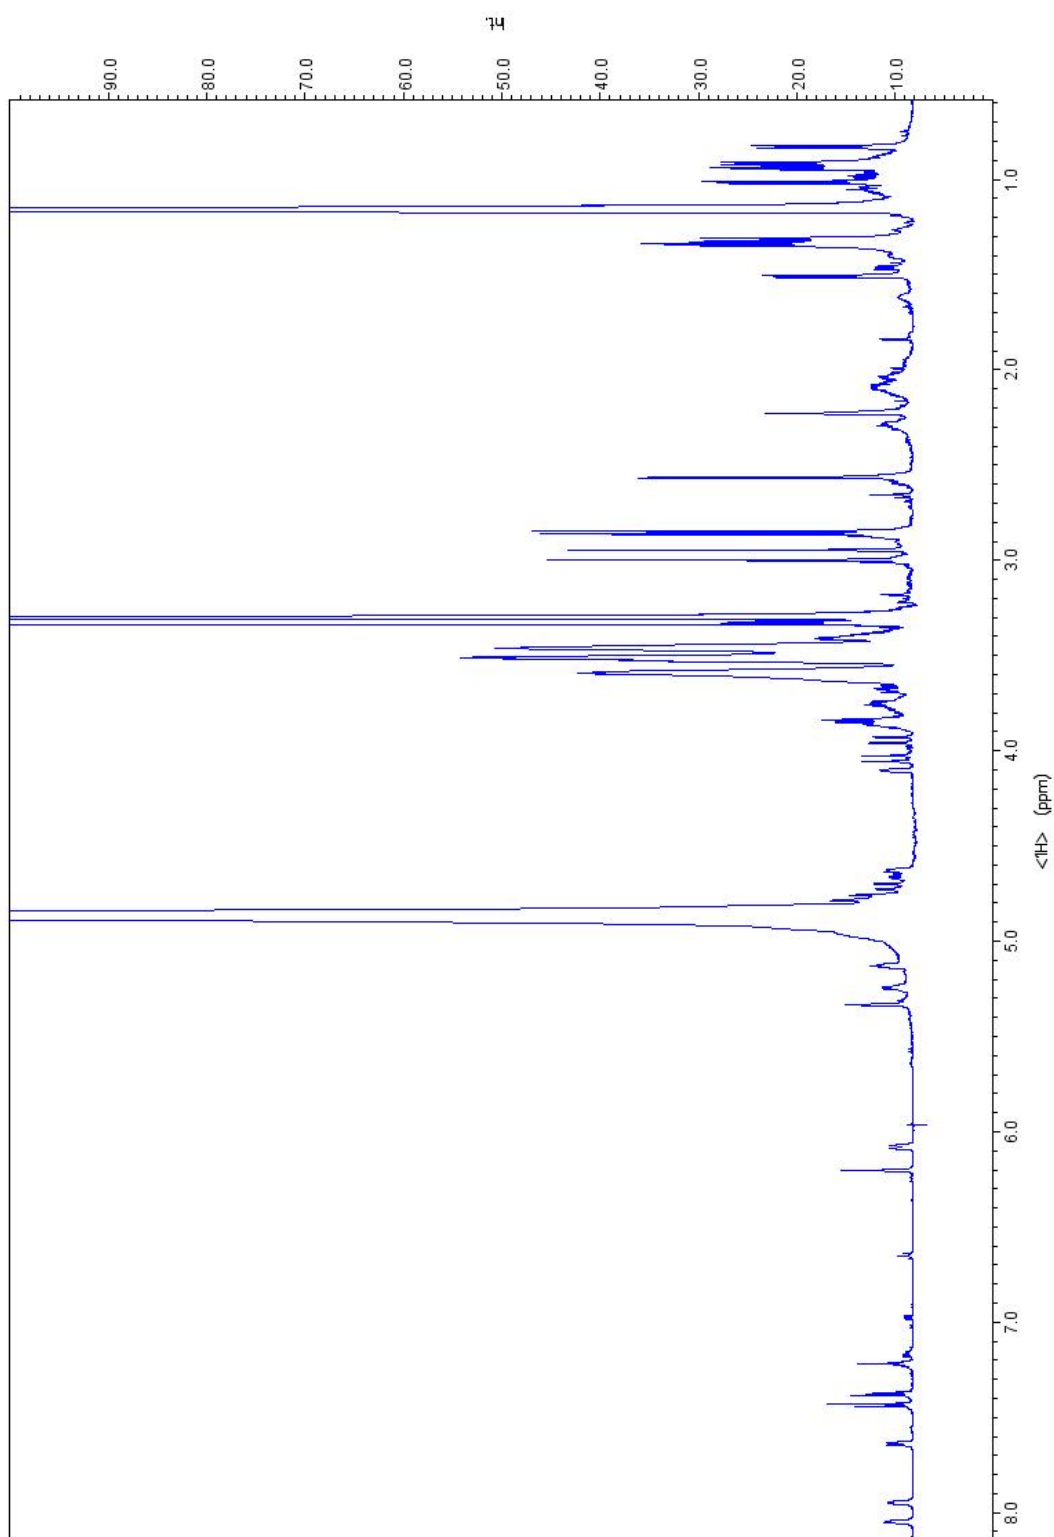

**Figure S6:**  $^1\text{H}$  NMR spectrum of actinomycin  $\text{Y}_2$  (**2**) ( $\text{CD}_3\text{OD}$ , 600 MHz).

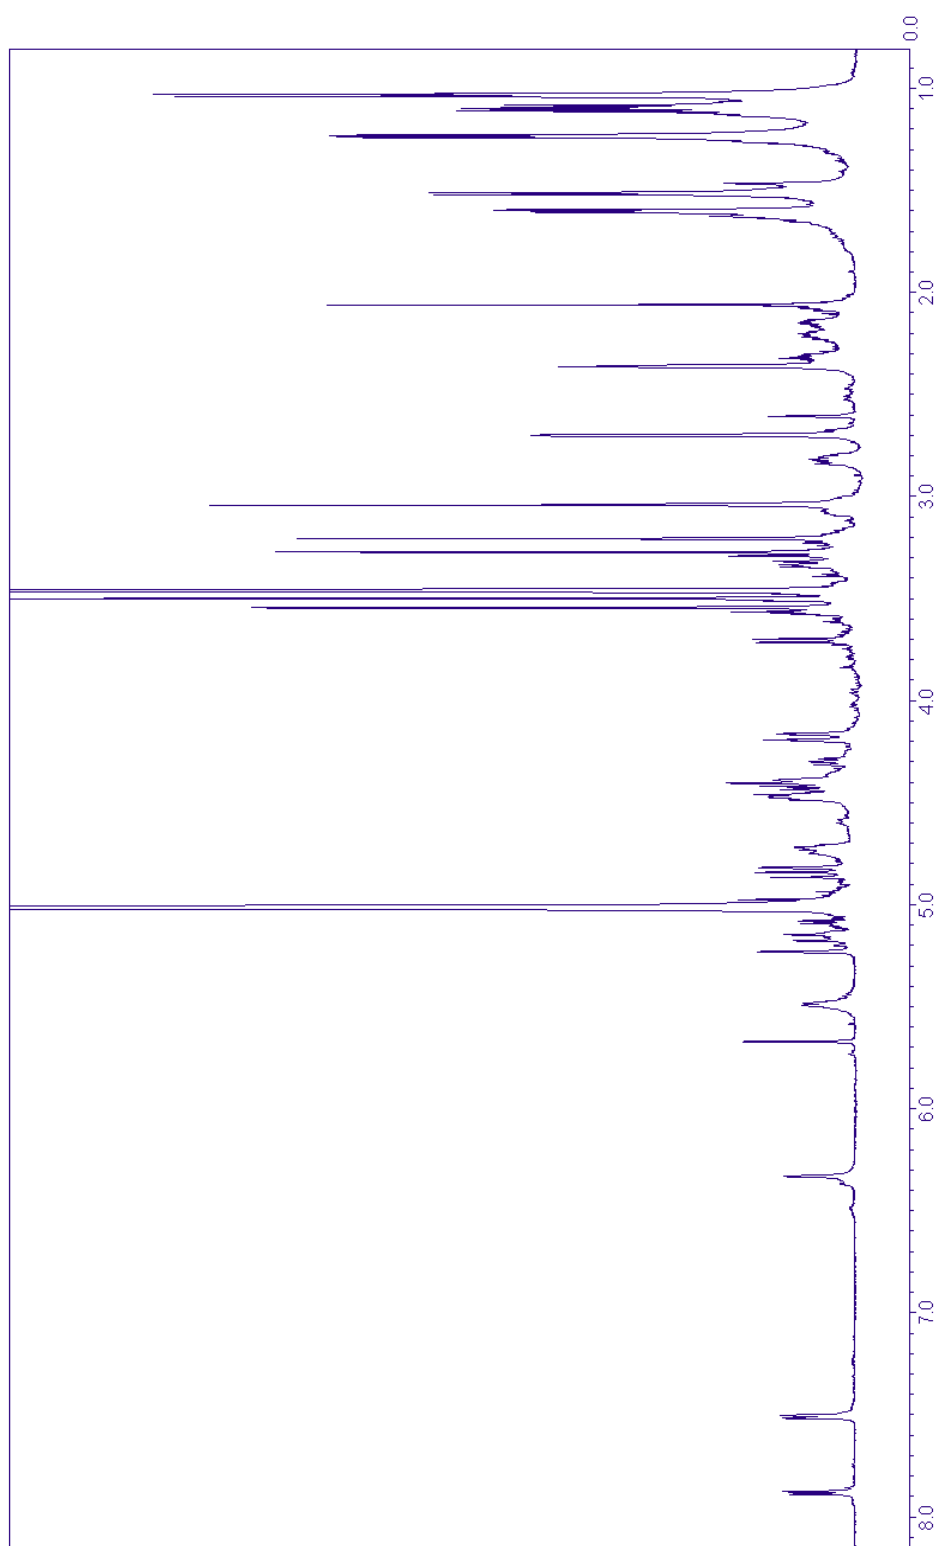

**Figure S7:**  $^1\text{H}$  NMR spectrum of actinomycin  $\text{Y}_3$  (**3**) ( $\text{CD}_3\text{OD}$ , 600 MHz).



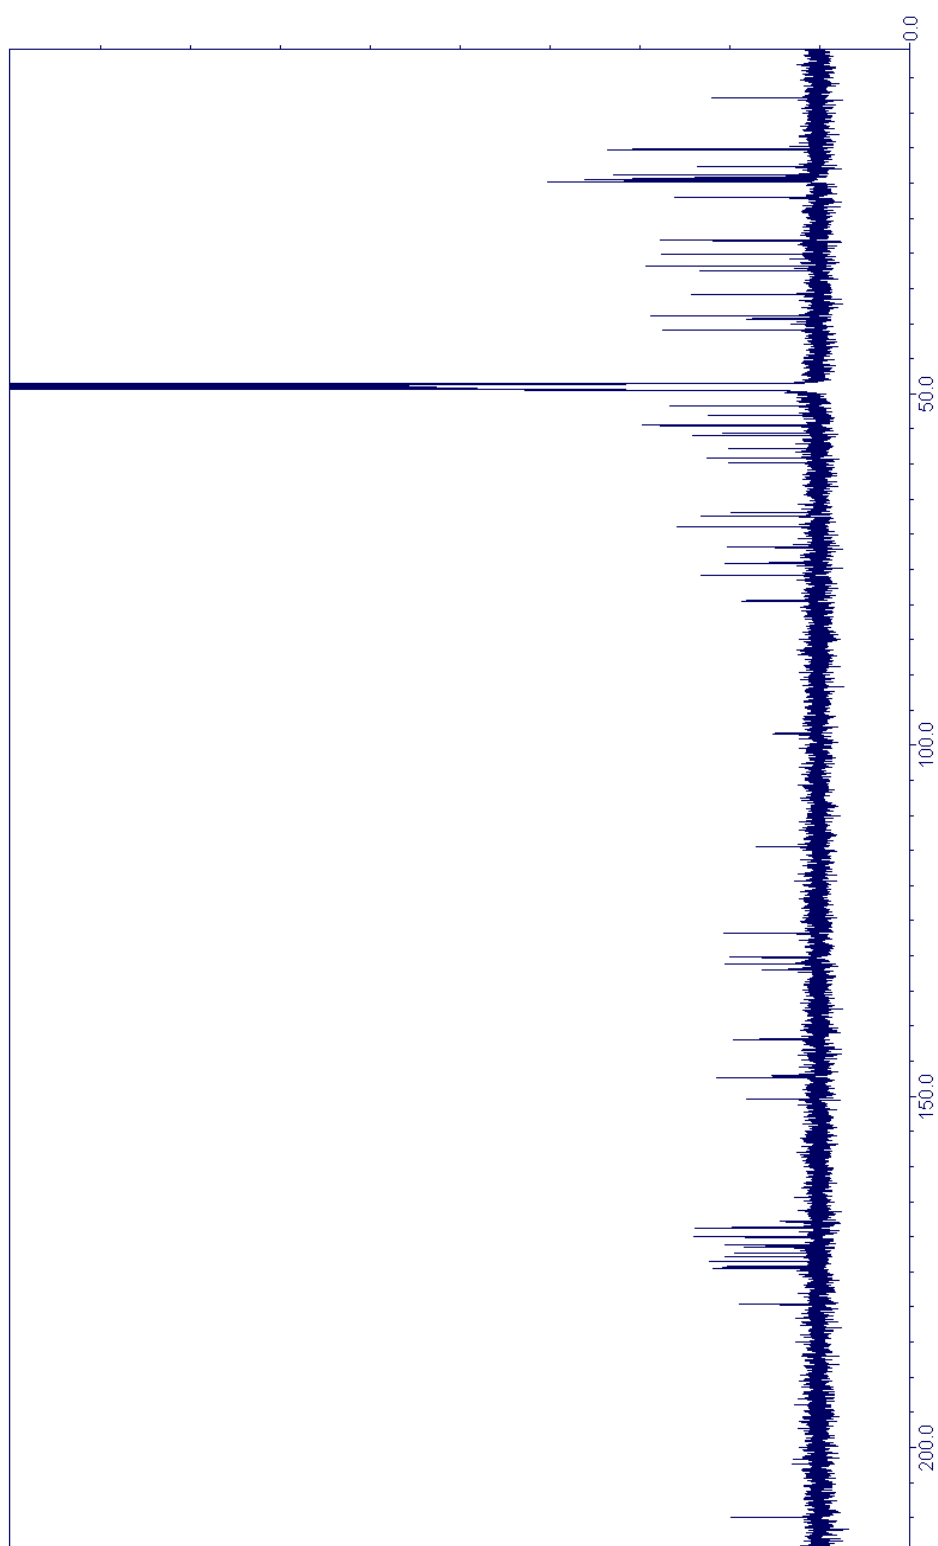

**Figure S8:**  $^{13}\text{C}$  NMR spectrum of actinomycin  $\text{Y}_3$  (**3**) ( $\text{CD}_3\text{OD}$ , 150 MHz).

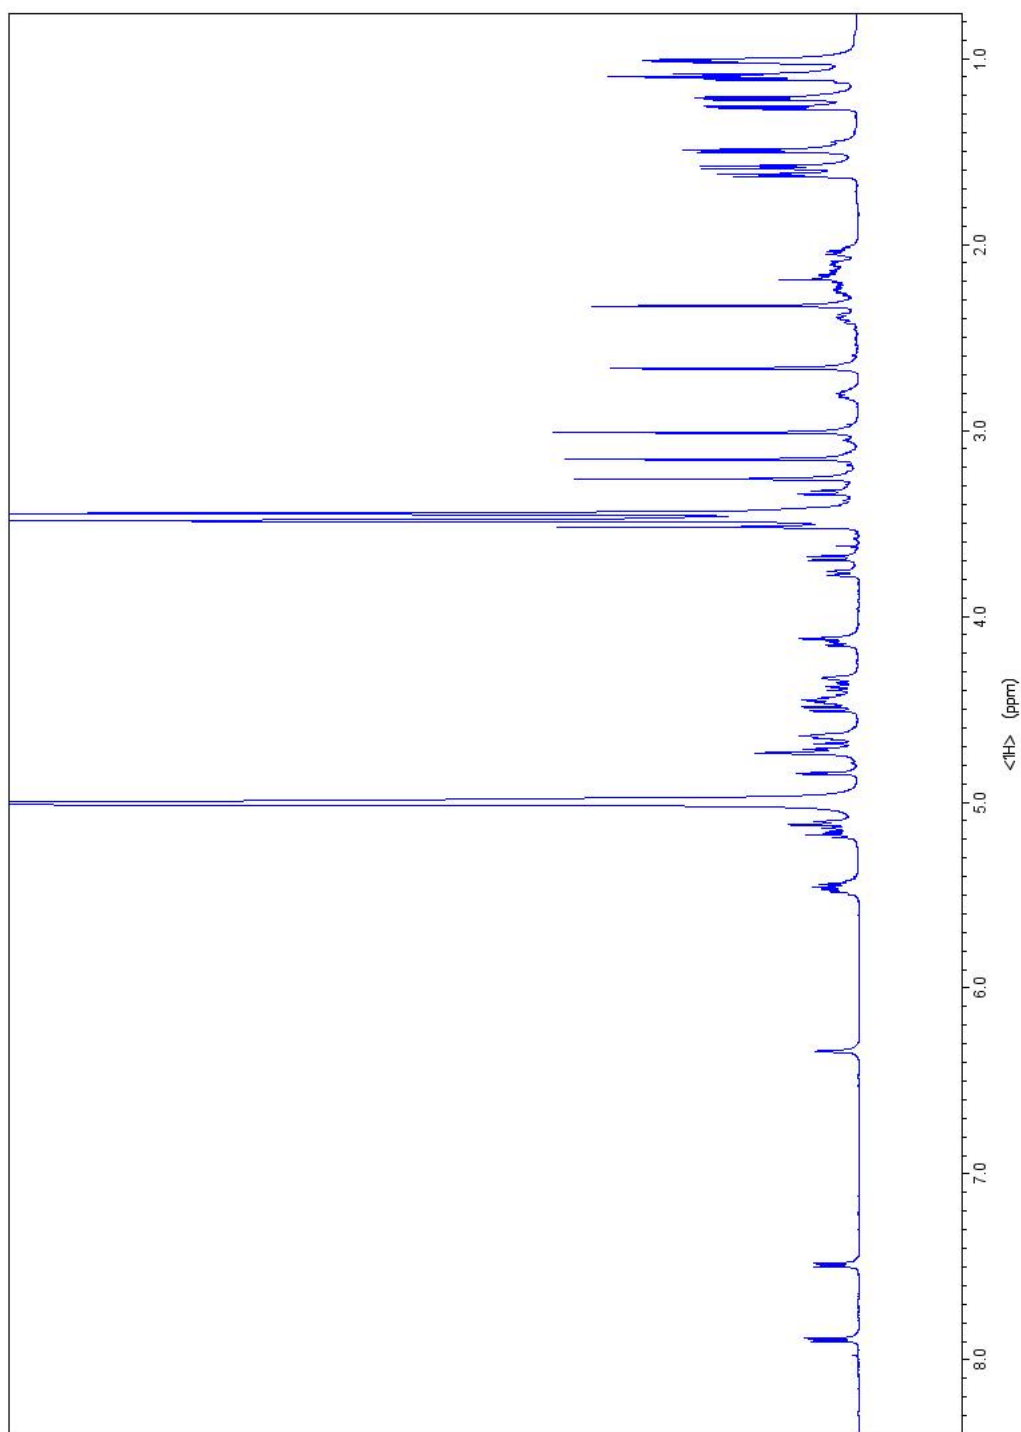

**Figure S9:**  $^1\text{H}$  NMR spectrum of actinomycin  $\text{Y}_4$  (**4**) ( $\text{CD}_3\text{OD}$ , 600 MHz).

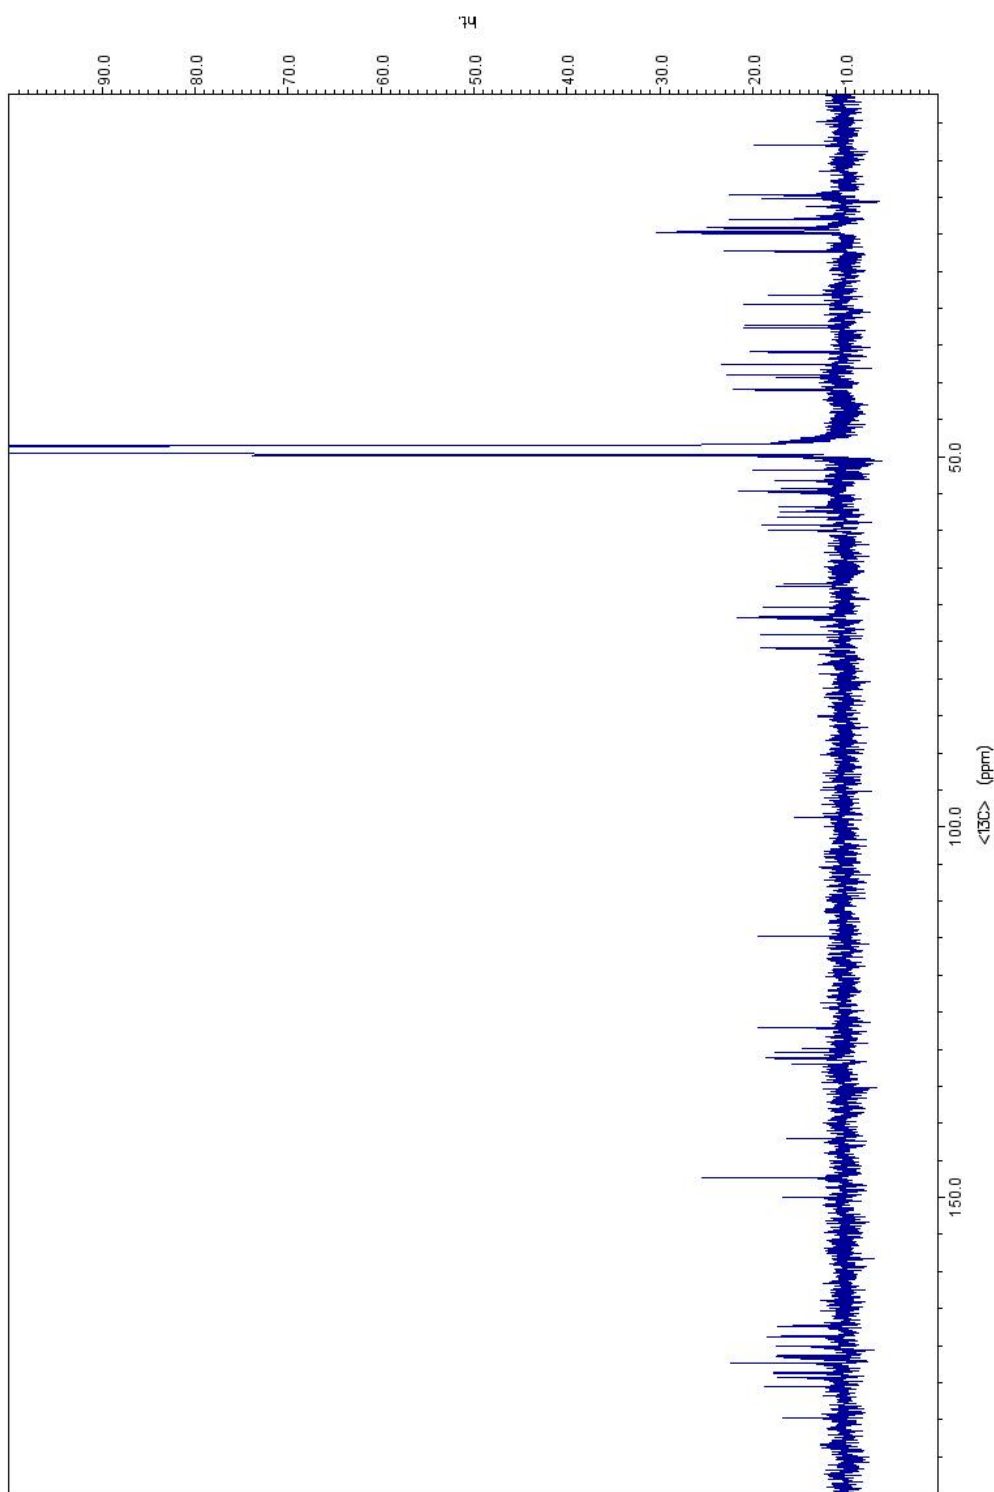

**Figure S10:**  $^{13}\text{C}$  NMR spectrum of actinomycin  $\text{Y}_4$  (**4**) ( $\text{CD}_3\text{OD}$ , 150 MHz).

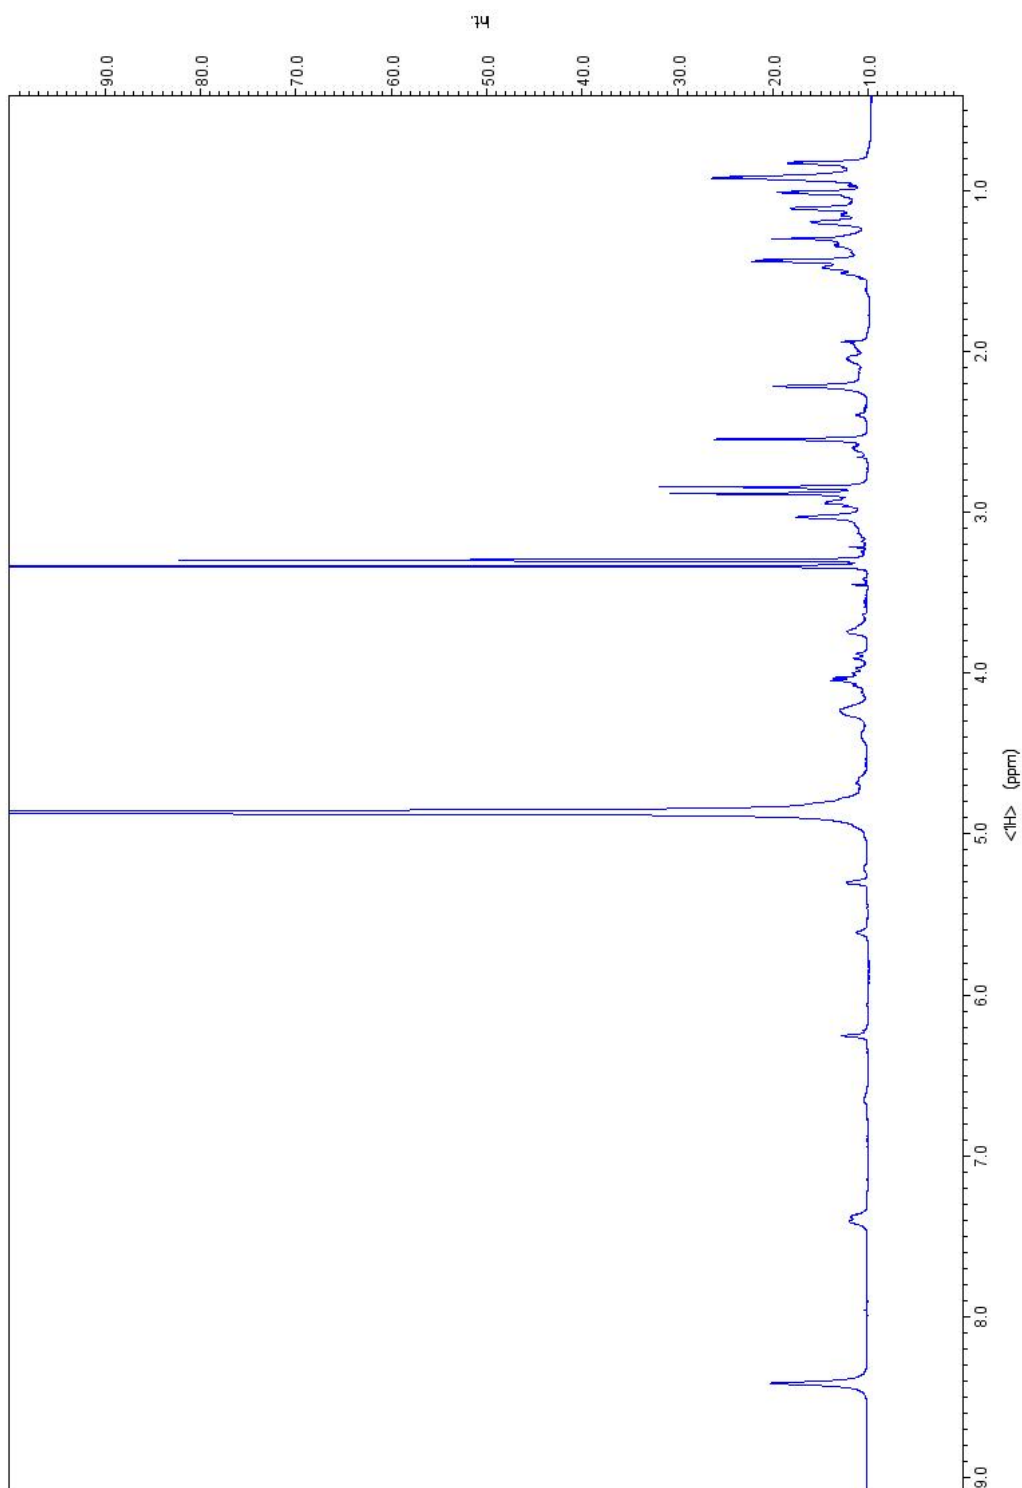

**Figure S11:**  $^1\text{H}$  NMR spectrum of actinomycin  $\text{Y}_5$  (5) ( $\text{CD}_3\text{OD}$ , 600 MHz).

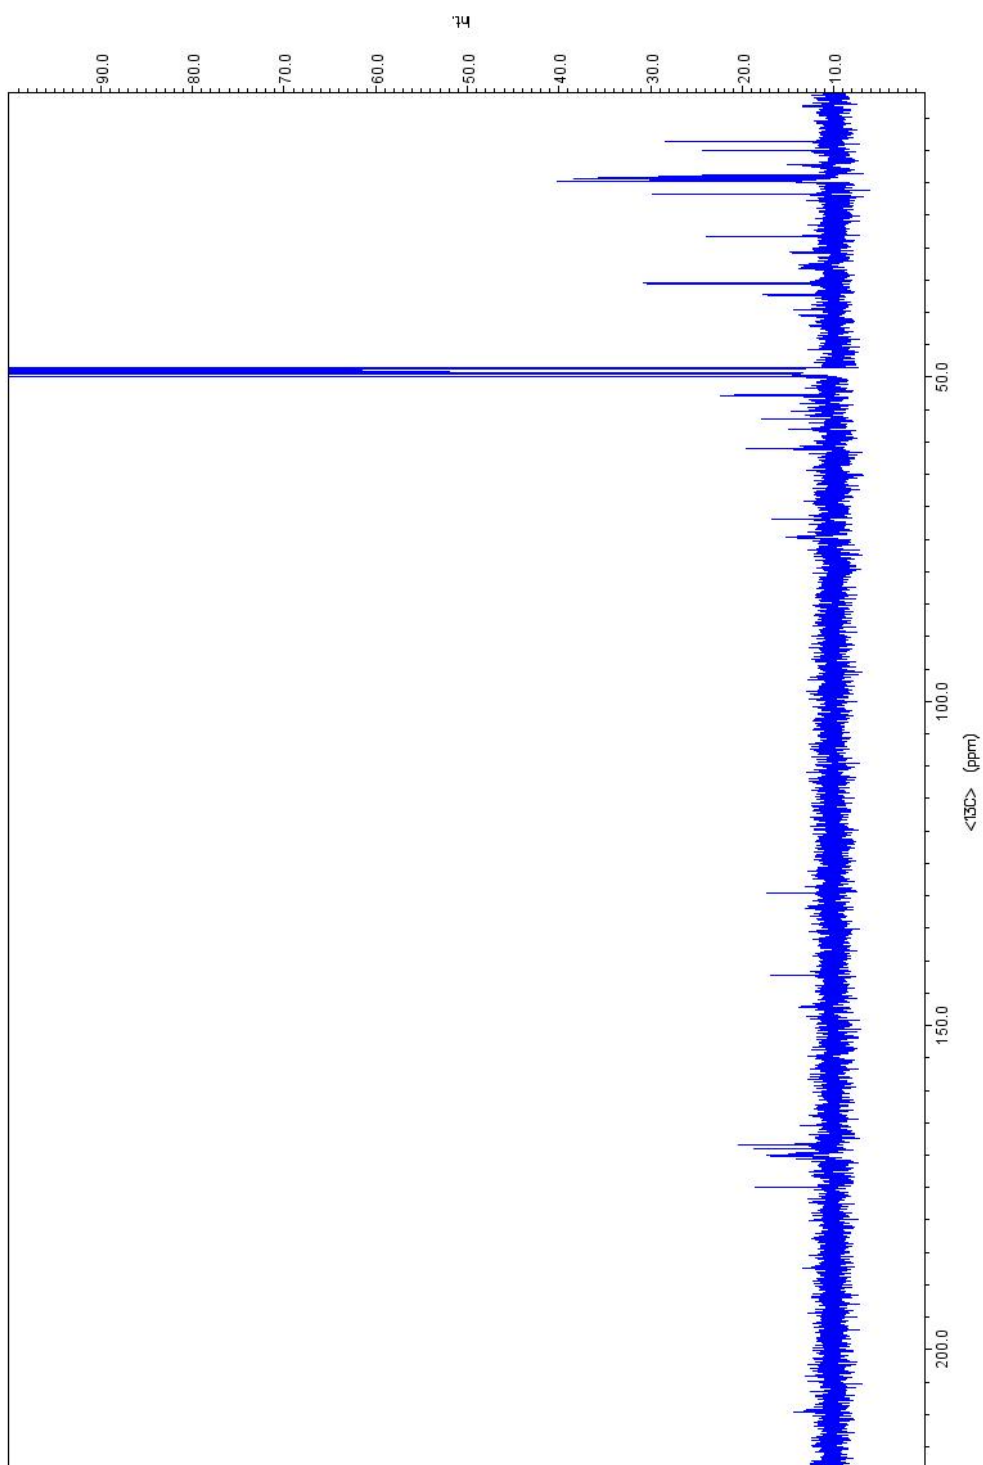

**Figure S12:**  $^{13}\text{C}$  NMR spectrum of actinomycin  $\text{Y}_5$  (**5**) ( $\text{CD}_3\text{OD}$ , 150 MHz).

## References and Notes

1. P. Marfey, *Carlsberg Res. Commun.*, 1984, **49**, 591-596.
2. M. L. Devan, T. I. Orlova and A. B. Silaev, *Antibiotiki*, 1974, **19**, 107-111.
3. *Dictionary of Natural Products on CD-ROM, Version 13:2*, Chapman & Hall / CRC, Boca Raton (FL), 2004.
4. H. Brockmann and N. Pfennig, *Naturwissenschaften*, 1952, **39**, 419-420.
5. H. Brockmann and B. Franck, *Naturwissenschaften*, 1960, **47**, 15.
6. H. Brockmann, G. Bohnsack, B. Franck, H. Grone, H. Muxfeldt and C. H. Suling, *Angew. Chem.*, 1956, **68**, 70-71.
7. A. W. Johnson and A. B. Mauger, *Biochem. J.*, 1959, 535-538.
8. G. Schmidt-Kastner, *Annals of the New York Academy of Sciences*, 1960, **89**, 299-303.
9. H. Brockmann, *Annals of the New York Academy of Sciences*, 1960, **89**, 323-335.
10. H. Brockmann and J. H. Manegold, *Chem. Ber.*, 1962, **95**, 1081-1093.
11. H. Brockmann and J. H. Manegold, *Chem. Ber.*, 1960, **93**, 2971-2982.
12. H. Brockmann and G. Pampus, *Angew. Chem.*, 1955, **67**, 519.
13. A. Lifferth, I. Bahner, H. Lackner and M. Schafer, *Z. Naturforsch., B: Chem. Sci.*, 1999, **54**, 681-691.
14. H. Lackner, I. Bahner, N. Shigematsu, L. K. Pannell and A. B. Mauger, *J. Nat. Prod.*, 2000, **63**, 352-356.
15. M. Hanada, K. Sugawara, Y. Nishiyama, H. Kamei, M. Hatori and M. Konishi, *J. Antibiot.*, 1992, **45**, 20-28.
16. H. Lackner, H. Hulsmann, S. Heinze, H. Simon, H. Bar, C. Zimmer and U. Gräfe, *J. Antibiot.*, 2000, **53**, 84-87.
17. J. Bitzer, V. Gesheva and A. Zeeck, *J. Nat. Prod.*, 2006, **69**, 1153-1157.
18. A. B. Mauger and O. A. Stuart, *J. Antibiot.*, 1990, **43**, 220-221.
19. E. Katz, C. R. Waldron and M. L. Meloni, *J. Bacteriol.*, 1961, **82**, 600-608.
20. H. Brockmann, *Angew. Chem.*, 1960, **24**, 939-947.
21. V. S. Kuznetsova, T. I. Orlova and A. B. Silaev, *Antibiotiki*, 1971, **16**, 18-21.
22. V. S. Kuznetsova, T. I. Orlova and A. B. Silaev, *Antibiotiki*, 1974, **19**, 295-298.
23. T. I. Orlova, N. V. Sorokina and A. B. Silaev, *Antibiotiki*, 1972, **17**, 409-417.
24. H. Lackner, *personal communication*, 2005.
25. E. Katz, W. K. Williams, K. T. Mason and A. B. Mauger, *Antimicrob. Agents Chemother.*, 1977, **11**, 1056-1063.
26. A. B. Mauger, *Topics in Antibiotic Chemistry*, 1980, **5**, 229-306.
27. J. V. Formica and E. Katz, *J. Biol. Chem.*, 1973, **248**, 2066-2071.
28. J. S. Nishimura and W. F. Bowers, *Biochem. Biophys. Res. Commun.*, 1967, **28**, 665-670.
29. E. Katz, *Annals of the New York Academy of Sciences*, 1960, **89**, 304-322.
30. J. V. Formica and M. A. Apple, *Antimicrob. Agents Chemother.*, 1976, **9**, 214-212.
